# Supplementary material
Source: Research Square preprint supplement (doi:10.21203/rs.3.rs-9465199/v1)

## Supplementary Materials

### Comparative Genomic and Metabolomic Characterization of *Lactiplantibacillus plantarum* LP140 and *Bifidobacterium breve* BB010 Reveals Distinct Metabolic Signatures Relevant to the Gut–Brain Axis

Tamara Aleksandrzyk-Piekarczyk<sup>1,\*</sup>, Agnieszka K. Szczepankowska<sup>1</sup>, Mariusz Radkiewicz<sup>1</sup>, Emilia Samborowska<sup>1</sup>, Bożena Cukrowska<sup>2</sup>

<sup>1</sup>Institute of Biochemistry and Biophysics, Polish Academy of Sciences (IBB PAS), Pawińskiego 5A, 02-106 Warsaw, Poland

<sup>2</sup>Department of Research and Development, Nordic Biotic Ltd., Złota 59, 00-120 Warsaw, Poland

**Table S1. Comparison of PGAP and Bakta annotation outputs for the analyzed genomes.** PGAP was used as the public-reference annotation framework, whereas Bakta served as a complementary local re-annotation layer for pathway-centered functional screening. The two pipelines were broadly consistent in overall genome description, but differed in CDS counts, pseudogene calls, and selected non-coding or accessory features.

| Strain                    | Annotation pipeline | Genome size (bp) | GC (%) | Replicons | Genes total | CDSs total | Protein-coding CDSs / CDSs excluding pseudogenes* | Pseudogenes | tRNAs | rRNAs | ncRNAs | tmRNA | CRISPR arrays | Notes                                                                       |
|---------------------------|---------------------|------------------|--------|-----------|-------------|------------|---------------------------------------------------|-------------|-------|-------|--------|-------|---------------|-----------------------------------------------------------------------------|
| <i>B. breve</i> BB010     | PGAP v6.10          | 2,274,113        | 58.6   | 1         | 1,952       | 1,887      | 1,805                                             | 82          | 53    | 9     | 3      | 0     | 2             | Public reference annotation associated with NCBI submission                 |
| <i>B. breve</i> BB010     | Bakta v1.10.4       | 2,274,113        | 58.6   | 1         | —           | 1,862      | 1,855                                             | 7           | 53    | 9     | 2      | 1     | 3             | Local functional re-annotation used for downstream pathway analysis         |
| <i>L. plantarum</i> LP140 | PGAP v6.6           | 3,371,266        | 44.4   | 6         | 3,243       | 3,149      | 3,106                                             | 43          | 74    | 16    | 4      | 0     | 0             | Public reference annotation associated with the previously published genome |
| <i>L. plantarum</i> LP140 | Bakta v1.6.0        | 3,371,266        | 44.4   | 6         | —           | 3,193      | 3,185                                             | 8           | 75    | 16    | 9      | 1     | 0             | Local re-annotation used for harmonized comparative functional analysis     |

\*For PGAP, the value corresponds to protein-coding CDSs reported directly by the pipeline. For Bakta, the value corresponds to CDSs excluding pseudogenes, calculated from the Bakta summary output.

**Table S2. Diagnostic genes and pathway support in *B. breve* BB010 and *L. plantarum* LP140** Public PGAP / GenBank annotations were used as the primary identifiers, whereas Bakta annotations served as a complementary functional layer. KEGG Orthology assignments and KEGG Mapper Reconstruction were performed on Bakta-derived protein sets and were used as pathway-level support for final interpretation.

| Category            | Trait / pathway | Diagnostic gene / enzyme | BB010 PGAP                                                                                                                             | BB010 Bakta                                                                       | LP140 PGAP  | LP140 Bakta    | KO / KEGG                               | Role                      | Interpretation                |
|---------------------|-----------------|--------------------------|----------------------------------------------------------------------------------------------------------------------------------------|-----------------------------------------------------------------------------------|-------------|----------------|-----------------------------------------|---------------------------|-------------------------------|
| Vitamins/co factors | B1              | <i>thiM</i>              | AC0YDK_06655                                                                                                                           | BB01_01317 <i>thiM</i>                                                            | LP140_00465 | <i>thiM</i>    | BB010 partial; LP140 salvage complete   | thiamine salvage          | LP140 stronger                |
| Vitamins/co factors | B1              | <i>thiC</i>              | AC0YDK_06660                                                                                                                           | BB01_01318 <i>thiC</i>                                                            | —           | —              | BB010 partial; LP140 de novo incomplete | HMP-P synthase            | mainly BB010 support          |
| Vitamins/co factors | B1              | <i>thiD</i>              | AC0YDK_06670                                                                                                                           | BB01_01320 <i>thiD</i>                                                            | LP140_00470 | <i>thiD</i>    | BB010 partial; LP140 salvage complete   | HMP/PMP kinase            | LP140 stronger                |
| Vitamins/co factors | B2              | <i>fmnP/ribU</i>         | AC0YDK_06735                                                                                                                           | BB01_01333 <i>fmnP/ribU</i>                                                       | LP140_08200 | <i>fmnP</i>    | BB010 weak; LP140 near-complete         | riboflavin uptake/support | LP140 stronger                |
| Vitamins/co factors | B3 / NAD        | <i>pncB</i>              | AC0YDK_02030                                                                                                                           | BB01_00406 <i>pncB</i>                                                            | LP140_02345 | <i>pncB</i>    | BB010 complete; LP140 partial           | NAD branch                | BB010 stronger                |
| Vitamins/co factors | B5              | canonical B5 genes       | —                                                                                                                                      | incomplete                                                                        | —           | incomplete     | partial / partial                       | pantothenate biosynth.    | weak in both                  |
| Vitamins/co factors | CoA from B5     | <i>coaD</i>              | AC0YDK_02005                                                                                                                           | BB01_00401 <i>coaD</i>                                                            | LP140_09240 | <i>coaD</i>    | BB010 near-complete; LP140 complete     | CoA biosynth.             | LP140 stronger                |
| Vitamins/co factors | CoA from B5     | <i>coaE</i>              | AC0YDK_03895                                                                                                                           | BB01_00769 <i>coaE</i>                                                            | LP140_06565 | <i>coaE</i>    | BB010 near-complete; LP140 complete     | CoA biosynth.             | LP140 stronger                |
| Vitamins/co factors | B6 / PLP        | <i>pdxS</i>              | AC0YDK_02745                                                                                                                           | BB01_00546 <i>pdxS</i>                                                            | —           | —              | BB010 complete; LP140 partial           | PLP synthase              | BB010 stronger                |
| Vitamins/co factors | B6 / PLP        | <i>pdxT</i>              | AC0YDK_02750                                                                                                                           | BB01_00547 <i>pdxT</i>                                                            | —           | —              | BB010 complete; LP140 partial           | PLP synthase              | BB010 stronger                |
| Vitamins/co factors | B7              | <i>bioY</i>              | AC0YDK_08700                                                                                                                           | BB01_01722 <i>bioY</i>                                                            | LP140_01415 | <i>bioY</i>    | no complete module                      | biotin uptake             | uptake only                   |
| Vitamins/co factors | B7              | <i>birA</i>              | AC0YDK_08705<br><i>birA</i> -like                                                                                                      | BB01_01723 <i>birA</i>                                                            | LP140_01420 | <i>birA</i>    | no complete module                      | biotin ligase             | uptake/usage only             |
| Vitamins/co factors | B9 / THF        | <i>folE</i>              | AC0YDK_07630                                                                                                                           | BB01_01510 <i>folE</i>                                                            | LP140_14220 | <i>folE</i>    | near-complete / near-complete           | THF biosynth.             | strong but incomplete in both |
| Vitamins/co factors | B9 / THF        | <i>folP</i>              | AC0YDK_07625                                                                                                                           | BB01_01509 <i>folP</i>                                                            | LP140_14205 | <i>folP</i>    | near-complete / near-complete           | THF biosynth.             | strong but incomplete in both |
| Vitamins/co factors | B9 / THF        | <i>folD</i>              | —                                                                                                                                      | BB01_00767 <i>folD</i>                                                            | LP140_06960 | <i>folD</i>    | near-complete / near-complete           | C1/THF metabolism         | supports THF network          |
| Vitamins/co factors | B9 / THF        | <i>folA</i>              | AC0YDK_07790                                                                                                                           | BB01_01540 <i>folA</i>                                                            | LP140_08125 | <i>folA</i>    | near-complete / near-complete           | DHFR step                 | late THF support              |
| Vitamins/co factors | B9 precursor    | <i>pabA</i>              | AC0YDK_00370                                                                                                                           | BB01_00079 <i>pabA</i>                                                            | LP140_07200 | <i>pabA</i>    | near-complete / near-complete           | pABA branch               | precursor support             |
| Vitamins/co factors | B12             | canonical B12 genes      | —                                                                                                                                      | —                                                                                 | —           | —              | not supported / not supported           | cobalamin biosynth.       | unsupported in both           |
| AA / related        | Ser             | <i>serA</i>              | AC0YDK_06450                                                                                                                           | BB01_01275 <i>serA</i>                                                            | —           | weaker support | BB010 complete; LP140 partial           | Ser biosynth.             | BB010 stronger                |
| AA / related        | Met             | <i>metA, metF, metB</i>  | AC0YDK_01590 ( <i>metA</i> )<br>AC0YDK_02705 ( <i>metB</i> )<br>AC0YDK_04990 ( <i>metF</i> )                                           | BB01_00317 <i>metA</i> ,<br>BB01_00538 <i>metB</i>                                | —           | strong support | complete / complete                     | Met biosynth.             | strong in both                |
| AA / related        | Val/Ile         | <i>ilvB, ilvH, ilvC</i>  | AC0YDK_01975 ( <i>ilvH</i> / <i>ilvN</i> -like)<br>AC0YDK_01980 ( <i>ilvB</i> ),<br>AC0YDK_00590/AC0YDK_0059<br>5 ( <i>ilvC</i> -like) | BB01_00395 <i>ilvH</i> , BB01_00396<br><i>ilvB</i> , BB01_00121/00122 <i>ilvC</i> | —           | weaker support | complete / partial                      | BCAA biosynth.            | BB010 stronger                |

| Category              | Trait / pathway     | Diagnostic gene / enzyme                          | BB010 PGAP                                                                                                                    | BB010 Bakta                                                                                            | LP140 PGAP                                                                  | LP140 Bakta                      | KO / KEGG       | Role                                        | Interpretation                                       |
|-----------------------|---------------------|---------------------------------------------------|-------------------------------------------------------------------------------------------------------------------------------|--------------------------------------------------------------------------------------------------------|-----------------------------------------------------------------------------|----------------------------------|-----------------|---------------------------------------------|------------------------------------------------------|
| <b>AA / related</b>   | Leu                 | <i>leuA, leuB</i>                                 | AC0YDK_00895 ( <i>leuA</i> )<br>AC0YDK_02430 ( <i>leuB</i> )                                                                  | BB01_00179 <i>leuA</i> , BB01_00484 <i>leuB</i>                                                        | —                                                                           | —                                | weaker support  | complete / partial                          | Leu biosynth. BB010 stronger                         |
| <b>AA / related</b>   | Lys                 | <i>lysC, asd, dapA, dapB</i>                      | C0YDK_00795 ( <i>lysC</i> ),<br>AC0YDK_00805 ( <i>asd</i> ),<br>AC0YDK_02550 ( <i>dapA</i> ),<br>AC0YDK_02545 ( <i>dapB</i> ) | BB01_00160 <i>lysC</i> , BB01_00162 <i>asd</i> ,<br>BB01_00172 <i>dapA</i> ,<br>BB01_00507 <i>dapB</i> | V2P12_08000,<br>V2P12_09055,<br>V2P12_11490                                 | —                                | strong support  | complete / near-complete                    | Lys biosynth. strong in both                         |
| <b>AA / related</b>   | Arg/Orn             | orn/arg enzymes                                   | AC0YDK_03520<br>AC0YDK_03525                                                                                                  | strong support                                                                                         | V2P12_02125,<br>V2P12_02130                                                 | —                                | strong support  | complete / complete                         | Glu→Orn→Arg strong in both                           |
| <b>AA / related</b>   | Pro                 | <i>putP/proP</i> + pathway                        | AC0YDK_00295 ( <i>putP</i> -like)                                                                                             | BB01_00064 <i>putP</i> ,<br>BB01_01358 <i>proP</i>                                                     | —                                                                           | —                                | strong support  | complete / complete                         | Pro biosynth./transport strong in both               |
| <b>AA / related</b>   | His                 | histidine enzymes                                 | AC0YDK_06530<br>AC0YDK_06535                                                                                                  | near-complete                                                                                          | V2P12_11020,<br>V2P12_11055,<br>V2P12_11070                                 | —                                | complete        | near-complete / complete                    | His biosynth. LP140 stronger                         |
| <b>AA / related</b>   | Trp                 | <i>trpA, trpD, trpE</i>                           | AC0YDK_05405<br>AC0YDK_05970<br>AC0YDK_05545                                                                                  | partial                                                                                                | V2P12_07075,<br>V2P12_07080,<br>V2P12_07090,<br>V2P12_07095                 | —                                | complete        | partial / complete                          | Trp biosynth. LP140 stronger                         |
| <b>AA / related</b>   | GABA biosynth.      | glutamate decarboxylase                           | —                                                                                                                             | no major GAD locus                                                                                     | V2P12_14435                                                                 | LP140_14645 <i>gadA</i>          | —               | BB010 weak; LP140 partial                   | Glu→GABA LP140 stronger                              |
| <b>AA / related</b>   | GABA export         | canonical <i>gadC</i> / non-canonical transporter | —                                                                                                                             | —                                                                                                      | V2P12_12995<br><i>yjeM</i>                                                  | LP140_13185<br><i>yjeM</i>       | —               | canonical <i>gadC</i> absent; LP140 partial | putative GABA transport LP140 partial, non-canonical |
| <b>Organic acids</b>  | Lactate             | <i>ldh</i>                                        | AC0YDK_05140,<br>AC0YDK_06475                                                                                                 | BB01_01015 <i>ldh</i> ,<br>BB01_01280 <i>ldh</i>                                                       | multiple PGAP loci                                                          | multiple <i>ldh</i> -like copies | —               | complete / complete                         | pyruvate→lactate strong in both                      |
| <b>Organic acids</b>  | Acetate             | <i>pta, ackA</i>                                  | AC0YDK_03995 ( <i>pta</i> ),<br>AC0YDK_03990 ( <i>ackA</i> -like)                                                             | BB01_00789 <i>pta</i> ,<br>BB01_00788 <i>ackA</i>                                                      | V2P12_03720;<br>V2P12_00865,<br>V2P12_01260,<br>V2P12_09665                 | —                                | supported       | complete / complete                         | PTA-AK route strong in both                          |
| <b>Organic acids</b>  | Succinate           | <i>ppc, pyc, pckA, fum, sdh/frd</i> -like         | AC0YDK_00285,<br>AC0YDK_04165                                                                                                 | BB01_00062 <i>ppc</i> + limited support                                                                | V2P12_09115,<br>V2P12_14425,<br>V2P12_04975                                 | —                                | broader support | partial / near-complete                     | reductive C4 branch LP140 stronger                   |
| <b>Organic acids</b>  | Propionate          | PDO / propionyl-CoA genes                         | —                                                                                                                             | —                                                                                                      | —                                                                           | —                                | —               | not supported / not supported               | propionate pathway unsupported in both               |
| <b>Organic acids</b>  | Butyrate            | <i>buk, ptb</i> , butyryl-CoA genes               | —                                                                                                                             | —                                                                                                      | —                                                                           | —                                | —               | not supported / not supported               | butyrate pathway unsupported in both                 |
| <b>Sugars</b>         | Lactose/galactose   | <i>lacY, lacZ, lacS/galP/rafP, lacE/F/G</i>       | AC0YDK_00045,<br>AC0YDK_00050,<br>AC0YDK_02130,<br>AC0YDK_02655,<br>AC0YDK_07720                                              | BB01_01528 <i>lacS/galP/rafP</i> ,<br>BB01_01529 <i>lacZ</i> ,<br>BB01_00301–00303 <i>lacE/F/G</i>     | V2P12_04265,<br>V2P12_06040,<br>V2P12_11875,<br>V2P12_14625,<br>V2P12_14695 | —                                | robust support  | complete / complete                         | uptake + hydrolysis strong in both                   |
| <b>Bile salt</b>      | BSH                 | <i>bsh</i>                                        | AC0YDK_04995                                                                                                                  | direct BSH support                                                                                     | V2P12_14940                                                                 | LP140_15155 <i>bsh</i>           | —               | complete / complete                         | bile salt deconjugation present in both              |
| <b>Poly amine</b>     | Polyamine turnover  | transport / antiporter genes                      | —                                                                                                                             | BB01_00338–00341,<br>BB01_00542                                                                        | —                                                                           | —                                | weaker support  | partial / partial                           | transport/turnover turnover > de novo in both        |
| <b>Biogenic amine</b> | Histamine biosynth. | <i>hdc</i>                                        | —                                                                                                                             | —                                                                                                      | —                                                                           | —                                | —               | not supported / not supported               | histamine formation unsupported in both              |
| <b>Biogenic amine</b> | Tyramine biosynth.  | <i>tyrDC/tdc</i>                                  | —                                                                                                                             | —                                                                                                      | —                                                                           | —                                | —               | not supported / not supported               | tyramine formation unsupported in both               |

**Table S3. Complete numerical dataset underlying the exploratory Biocrates MxP® Quant 500 analysis shown in Fig. 2.** Raw concentration values ( $\mu\text{M}$ ) in uninoculated medium control ( $C_{\text{control}}$ ) and cell-free spent medium ( $C_{\text{CFSM}}$ ), together with calculated net changes ( $\Delta = C_{\text{CFSM}} - C_{\text{control}}$ ) and  $\log_2$  fold-changes ( $\log_2\text{FC}$ ), corresponding to the exploratory dataset visualized in Fig. 2. The Biocrates dataset was acquired as a single exploratory measurement per strain/condition ( $n = 1$ ) and is provided for hypothesis generation and strain prioritization only.

| Strain                    | Class              | Metabolite   | $C_{\text{control}}$ [ $\mu\text{M}$ ] | $C_{\text{CFSM}}$ [ $\mu\text{M}$ ] | $\Delta$ [ $\mu\text{M}$ ] | $\log_2\text{FC}$ |
|---------------------------|--------------------|--------------|----------------------------------------|-------------------------------------|----------------------------|-------------------|
| <i>B. breve</i> BB010     | Alkaloids          | Trigonelline | 0.846                                  | 0.938                               | 0.092                      | 0.149             |
| <i>L. plantarum</i> LP140 | Alkaloids          | Trigonelline | 0.846                                  | 0.909                               | 0.063                      | 0.104             |
| <i>B. breve</i> BB010     | Amine Oxides       | TMAO         | 0.0075                                 | 0.0075                              | 0                          | 0                 |
| <i>L. plantarum</i> LP140 | Amine Oxides       | TMAO         | 0.0075                                 | 0.0075                              | 0                          | 0                 |
| <i>B. breve</i> BB010     | Aminoacids         | Ala          | 3268                                   | 4132                                | 864                        | 0.338             |
| <i>L. plantarum</i> LP140 | Aminoacids         | Ala          | 3268                                   | 2940                                | -328                       | -0.153            |
| <i>B. breve</i> BB010     | Aminoacids         | Arg          | 641                                    | 798                                 | 157                        | 0.316             |
| <i>L. plantarum</i> LP140 | Aminoacids         | Arg          | 641                                    | 729                                 | 88                         | 0.186             |
| <i>B. breve</i> BB010     | Aminoacids         | Asn          | 584                                    | 658                                 | 74                         | 0.172             |
| <i>L. plantarum</i> LP140 | Aminoacids         | Asn          | 584                                    | 245                                 | -339                       | -1.253            |
| <i>B. breve</i> BB010     | Aminoacids         | Asp          | 814                                    | 964                                 | 150                        | 0.244             |
| <i>L. plantarum</i> LP140 | Aminoacids         | Asp          | 814                                    | 418                                 | -396                       | -0.962            |
| <i>B. breve</i> BB010     | Aminoacids         | Gln          | 7.09                                   | 336                                 | 328.91                     | 5.567             |
| <i>L. plantarum</i> LP140 | Aminoacids         | Gln          | 7.09                                   | 24.7                                | 17.61                      | 1.801             |
| <i>B. breve</i> BB010     | Aminoacids         | Glu          | 2500                                   | 2676                                | 176                        | 0.098             |
| <i>L. plantarum</i> LP140 | Aminoacids         | Glu          | 2500                                   | 1439                                | -1061                      | -0.797            |
| <i>B. breve</i> BB010     | Aminoacids         | Gly          | 5129                                   | 6317                                | 1188                       | 0.301             |
| <i>L. plantarum</i> LP140 | Aminoacids         | Gly          | 5129                                   | 5653                                | 524                        | 0.14              |
| <i>B. breve</i> BB010     | Aminoacids         | His          | 159                                    | 250                                 | 91                         | 0.653             |
| <i>L. plantarum</i> LP140 | Aminoacids         | His          | 159                                    | 138                                 | -21                        | -0.204            |
| <i>B. breve</i> BB010     | Aminoacids         | Ile          | 763                                    | 963                                 | 200                        | 0.336             |
| <i>L. plantarum</i> LP140 | Aminoacids         | Ile          | 763                                    | 712                                 | -51                        | -0.1              |
| <i>B. breve</i> BB010     | Aminoacids         | Leu          | 1949                                   | 1961                                | 12                         | 0.009             |
| <i>L. plantarum</i> LP140 | Aminoacids         | Leu          | 1949                                   | 1779                                | -170                       | -0.132            |
| <i>B. breve</i> BB010     | Aminoacids         | Lys          | 468                                    | 674                                 | 206                        | 0.526             |
| <i>L. plantarum</i> LP140 | Aminoacids         | Lys          | 468                                    | 453                                 | -15                        | -0.047            |
| <i>B. breve</i> BB010     | Aminoacids         | Met          | 163                                    | 311                                 | 148                        | 0.932             |
| <i>L. plantarum</i> LP140 | Aminoacids         | Met          | 163                                    | 213                                 | 50                         | 0.386             |
| <i>B. breve</i> BB010     | Aminoacids         | Phe          | 745                                    | 833                                 | 88                         | 0.161             |
| <i>L. plantarum</i> LP140 | Aminoacids         | Phe          | 745                                    | 404                                 | -341                       | -0.883            |
| <i>B. breve</i> BB010     | Aminoacids         | Pro          | 457                                    | 603                                 | 146                        | 0.4               |
| <i>L. plantarum</i> LP140 | Aminoacids         | Pro          | 457                                    | 600                                 | 143                        | 0.393             |
| <i>B. breve</i> BB010     | Aminoacids         | Ser          | 945                                    | 1106                                | 161                        | 0.227             |
| <i>L. plantarum</i> LP140 | Aminoacids         | Ser          | 945                                    | 453                                 | -492                       | -1.061            |
| <i>B. breve</i> BB010     | Aminoacids         | Thr          | 850                                    | 1058                                | 208                        | 0.316             |
| <i>L. plantarum</i> LP140 | Aminoacids         | Thr          | 850                                    | 695                                 | -155                       | -0.29             |
| <i>B. breve</i> BB010     | Aminoacids         | Trp          | 154                                    | 179                                 | 25                         | 0.217             |
| <i>L. plantarum</i> LP140 | Aminoacids         | Trp          | 154                                    | 114                                 | -40                        | -0.434            |
| <i>B. breve</i> BB010     | Aminoacids         | Tyr          | 250                                    | 326                                 | 76                         | 0.383             |
| <i>L. plantarum</i> LP140 | Aminoacids         | Tyr          | 250                                    | 85.7                                | -164.3                     | -1.545            |
| <i>B. breve</i> BB010     | Aminoacids         | Val          | 1092                                   | 1482                                | 390                        | 0.441             |
| <i>L. plantarum</i> LP140 | Aminoacids         | Val          | 1092                                   | 1323                                | 231                        | 0.277             |
| <i>B. breve</i> BB010     | Aminoacids Related | 1-Met-His    | 0.49                                   | 0.843                               | 0.353                      | 0.783             |
| <i>L. plantarum</i> LP140 | Aminoacids Related | 1-Met-His    | 0.49                                   | 0.708                               | 0.218                      | 0.531             |
| <i>B. breve</i> BB010     | Aminoacids Related | 3-Met-His    | 0.584                                  | 0.882                               | 0.298                      | 0.595             |
| <i>L. plantarum</i> LP140 | Aminoacids Related | 3-Met-His    | 0.584                                  | 0.814                               | 0.23                       | 0.479             |
| <i>B. breve</i> BB010     | Aminoacids Related | 5-AVA        | 2.01                                   | 2.03                                | 0.02                       | 0.014             |
| <i>L. plantarum</i> LP140 | Aminoacids Related | 5-AVA        | 2.01                                   | 2.15                                | 0.14                       | 0.097             |
| <i>B. breve</i> BB010     | Aminoacids Related | AABA         | 8.03                                   | 7.52                                | -0.51                      | -0.095            |
| <i>L. plantarum</i> LP140 | Aminoacids Related | AABA         | 8.03                                   | 7.42                                | -0.61                      | -0.114            |
| <i>B. breve</i> BB010     | Aminoacids Related | ADMA         | 0.93                                   | 1.76                                | 0.83                       | 0.92              |
| <i>L. plantarum</i> LP140 | Aminoacids Related | ADMA         | 0.93                                   | 0.838                               | -0.092                     | -0.15             |
| <i>B. breve</i> BB010     | Aminoacids Related | Ac-Orn       | 1.14                                   | 1.8                                 | 0.66                       | 0.659             |
| <i>L. plantarum</i> LP140 | Aminoacids Related | Ac-Orn       | 1.14                                   | 1.61                                | 0.47                       | 0.498             |
| <i>B. breve</i> BB010     | Aminoacids Related | Anserine     | 5.31                                   | 6.41                                | 1.1                        | 0.272             |
| <i>L. plantarum</i> LP140 | Aminoacids Related | Anserine     | 5.31                                   | 4.81                                | -0.5                       | -0.143            |
| <i>B. breve</i> BB010     | Aminoacids Related | BABA         | 0.358                                  | 0.313                               | -0.045                     | -0.194            |
| <i>L. plantarum</i> LP140 | Aminoacids Related | BABA         | 0.358                                  | 0.456                               | 0.098                      | 0.349             |
| <i>B. breve</i> BB010     | Aminoacids Related | Betaine      | 275                                    | 316                                 | 41                         | 0.2               |
| <i>L. plantarum</i> LP140 | Aminoacids Related | Betaine      | 275                                    | 307                                 | 32                         | 0.159             |
| <i>B. breve</i> BB010     | Aminoacids Related | Carnosine    | 17.7                                   | 21.2                                | 3.5                        | 0.26              |
| <i>L. plantarum</i> LP140 | Aminoacids Related | Carnosine    | 17.7                                   | 18.4                                | 0.7                        | 0.056             |
| <i>B. breve</i> BB010     | Aminoacids Related | Cit          | 19.7                                   | 40.3                                | 20.6                       | 1.033             |
| <i>L. plantarum</i> LP140 | Aminoacids Related | Cit          | 19.7                                   | 22.4                                | 2.7                        | 0.185             |
| <i>B. breve</i> BB010     | Aminoacids Related | Creatinine   | 79.3                                   | 98.7                                | 19.4                       | 0.316             |
| <i>L. plantarum</i> LP140 | Aminoacids Related | Creatinine   | 79.3                                   | 133                                 | 53.7                       | 0.746             |

| Strain                    | Class              | Metabolite    | C <sub>control</sub> [μM] | C <sub>CFSM</sub> [μM] | Δ [μM]  | log <sub>2</sub> FC |
|---------------------------|--------------------|---------------|---------------------------|------------------------|---------|---------------------|
| <i>B. breve</i> BB010     | Aminoacids Related | Cystine       | 0.0025                    | 0.0025                 | 0       | 0                   |
| <i>L. plantarum</i> LP140 | Aminoacids Related | Cystine       | 0.0025                    | 0.0025                 | 0       | 0                   |
| <i>B. breve</i> BB010     | Aminoacids Related | DOPA          | 0.665                     | 0.793                  | 0.128   | 0.254               |
| <i>L. plantarum</i> LP140 | Aminoacids Related | DOPA          | 0.665                     | 0.503                  | -0.162  | -0.403              |
| <i>B. breve</i> BB010     | Aminoacids Related | HArg          | 0.254                     | 0.261                  | 0.007   | 0.039               |
| <i>L. plantarum</i> LP140 | Aminoacids Related | HArg          | 0.254                     | 0.582                  | 0.328   | 1.196               |
| <i>B. breve</i> BB010     | Aminoacids Related | Kynurenine    | 0.001                     | 0.001                  | 0       | 0                   |
| <i>L. plantarum</i> LP140 | Aminoacids Related | Kynurenine    | 0.001                     | 0.001                  | 0       | 0                   |
| <i>B. breve</i> BB010     | Aminoacids Related | Met-SO        | 250                       | 116                    | -134    | -1.108              |
| <i>L. plantarum</i> LP140 | Aminoacids Related | Met-SO        | 250                       | 60.9                   | -189.1  | -2.037              |
| <i>B. breve</i> BB010     | Aminoacids Related | Nitro-Tyr     | 0.005                     | 0.005                  | 0       | 0                   |
| <i>L. plantarum</i> LP140 | Aminoacids Related | Nitro-Tyr     | 0.005                     | 0.005                  | 0       | 0                   |
| <i>B. breve</i> BB010     | Aminoacids Related | Orn           | 27.5                      | 36                     | 8.5     | 0.389               |
| <i>L. plantarum</i> LP140 | Aminoacids Related | Orn           | 27.5                      | 38.6                   | 11.1    | 0.489               |
| <i>B. breve</i> BB010     | Aminoacids Related | PAG           | 0.003                     | 0.003                  | 0       | 0                   |
| <i>L. plantarum</i> LP140 | Aminoacids Related | PAG           | 0.003                     | 0.003                  | 0       | 0                   |
| <i>B. breve</i> BB010     | Aminoacids Related | PheAlaBetaine | 0.005                     | 0.005                  | 0       | 0                   |
| <i>L. plantarum</i> LP140 | Aminoacids Related | PheAlaBetaine | 0.005                     | 0.005                  | 0       | 0                   |
| <i>B. breve</i> BB010     | Aminoacids Related | ProBetaine    | 0.549                     | 0.787                  | 0.238   | 0.52                |
| <i>L. plantarum</i> LP140 | Aminoacids Related | ProBetaine    | 0.549                     | 0.722                  | 0.173   | 0.395               |
| <i>B. breve</i> BB010     | Aminoacids Related | SDMA          | 2.15                      | 6.13                   | 3.98    | 1.512               |
| <i>L. plantarum</i> LP140 | Aminoacids Related | SDMA          | 2.15                      | 9.64                   | 7.49    | 2.165               |
| <i>B. breve</i> BB010     | Aminoacids Related | Sarcosine     | 6.66                      | 6.66                   | 0       | 0                   |
| <i>L. plantarum</i> LP140 | Aminoacids Related | Sarcosine     | 6.66                      | 6.91                   | 0.25    | 0.053               |
| <i>B. breve</i> BB010     | Aminoacids Related | Taurine       | 26.1                      | 25.6                   | -0.5    | -0.028              |
| <i>L. plantarum</i> LP140 | Aminoacids Related | Taurine       | 26.1                      | 24                     | -2.1    | -0.121              |
| <i>B. breve</i> BB010     | Aminoacids Related | alpha-AAA     | 1.98                      | 2.97                   | 0.99    | 0.585               |
| <i>L. plantarum</i> LP140 | Aminoacids Related | alpha-AAA     | 1.98                      | 2.51                   | 0.53    | 0.342               |
| <i>B. breve</i> BB010     | Aminoacids Related | c4-OH-Pro     | 32.7                      | 27.6                   | -5.1    | -0.245              |
| <i>L. plantarum</i> LP140 | Aminoacids Related | c4-OH-Pro     | 32.7                      | 30.3                   | -2.4    | -0.11               |
| <i>B. breve</i> BB010     | Aminoacids Related | t4-OH-Pro     | 76.7                      | 94.8                   | 18.1    | 0.306               |
| <i>L. plantarum</i> LP140 | Aminoacids Related | t4-OH-Pro     | 76.7                      | 69.8                   | -6.9    | -0.136              |
| <i>B. breve</i> BB010     | Bile Acids         | CA            | 0.001                     | 0.001                  | 0       | 0                   |
| <i>L. plantarum</i> LP140 | Bile Acids         | CA            | 0.001                     | 0.001                  | 0       | 0                   |
| <i>B. breve</i> BB010     | Bile Acids         | CDCA          | 0.0015                    | 0.0015                 | 0       | 0                   |
| <i>L. plantarum</i> LP140 | Bile Acids         | CDCA          | 0.0015                    | 0.0015                 | 0       | 0                   |
| <i>B. breve</i> BB010     | Bile Acids         | DCA           | 0.0005                    | 0.0005                 | 0       | 0                   |
| <i>L. plantarum</i> LP140 | Bile Acids         | DCA           | 0.0005                    | 0.0005                 | 0       | 0                   |
| <i>B. breve</i> BB010     | Bile Acids         | GCA           | 0.004                     | 0.002                  | -0.002  | -1.00               |
| <i>L. plantarum</i> LP140 | Bile Acids         | GCA           | 0.004                     | 0.0005                 | -0.0035 | -3.00               |
| <i>B. breve</i> BB010     | Bile Acids         | GCDCA         | 0.0005                    | 0.0005                 | 0       | 0                   |
| <i>L. plantarum</i> LP140 | Bile Acids         | GCDCA         | 0.0005                    | 0.0005                 | 0       | 0                   |
| <i>B. breve</i> BB010     | Bile Acids         | GDCA          | 0.001                     | 0.001                  | 0       | 0                   |
| <i>L. plantarum</i> LP140 | Bile Acids         | GDCA          | 0.001                     | 0.001                  | 0       | 0                   |
| <i>B. breve</i> BB010     | Bile Acids         | GLCA          | 0.0005                    | 0.0005                 | 0       | 0                   |
| <i>L. plantarum</i> LP140 | Bile Acids         | GLCA          | 0.0005                    | 0.0005                 | 0       | 0                   |
| <i>B. breve</i> BB010     | Bile Acids         | GLCAS         | 0.0005                    | 0.0005                 | 0       | 0                   |
| <i>L. plantarum</i> LP140 | Bile Acids         | GLCAS         | 0.0005                    | 0.0005                 | 0       | 0                   |
| <i>B. breve</i> BB010     | Bile Acids         | GUDCA         | 0.0005                    | 0.001                  | 0.0005  | 1.00                |
| <i>L. plantarum</i> LP140 | Bile Acids         | GUDCA         | 0.0005                    | 0.0005                 | 0       | 0                   |
| <i>B. breve</i> BB010     | Bile Acids         | TCA           | 0.006                     | 0.001                  | -0.005  | -2.585              |
| <i>L. plantarum</i> LP140 | Bile Acids         | TCA           | 0.006                     | 0.002                  | -0.004  | -1.585              |
| <i>B. breve</i> BB010     | Bile Acids         | TCDCa         | 0.0005                    | 0.0005                 | 0       | 0                   |
| <i>L. plantarum</i> LP140 | Bile Acids         | TCDCa         | 0.0005                    | 0.0005                 | 0       | 0                   |
| <i>B. breve</i> BB010     | Bile Acids         | TDCA          | 0.0005                    | 0.0005                 | 0       | 0                   |
| <i>L. plantarum</i> LP140 | Bile Acids         | TDCA          | 0.0005                    | 0.0005                 | 0       | 0                   |
| <i>B. breve</i> BB010     | Bile Acids         | TLCA          | 0.0005                    | 0.0005                 | 0       | 0                   |
| <i>L. plantarum</i> LP140 | Bile Acids         | TLCA          | 0.0005                    | 0.0005                 | 0       | 0                   |
| <i>B. breve</i> BB010     | Bile Acids         | TrpBetaine    | 0.002                     | 0.002                  | 0       | 0                   |
| <i>L. plantarum</i> LP140 | Bile Acids         | TrpBetaine    | 0.002                     | 0.002                  | 0       | 0                   |
| <i>B. breve</i> BB010     | Biogenic Amines    | Dopamine      | 0.001                     | 0.001                  | 0       | 0                   |
| <i>L. plantarum</i> LP140 | Biogenic Amines    | Dopamine      | 0.001                     | 0.001                  | 0       | 0                   |
| <i>B. breve</i> BB010     | Biogenic Amines    | GABA          | 59.7                      | 60.7                   | 1       | 0.024               |
| <i>L. plantarum</i> LP140 | Biogenic Amines    | GABA          | 59.7                      | 148                    | 88.3    | 1.31                |
| <i>B. breve</i> BB010     | Biogenic Amines    | Histamine     | 0.69                      | 0.541                  | -0.149  | -0.351              |
| <i>L. plantarum</i> LP140 | Biogenic Amines    | Histamine     | 0.69                      | 0.508                  | -0.182  | -0.442              |
| <i>B. breve</i> BB010     | Biogenic Amines    | PEA           | 1.09                      | 0.518                  | -0.572  | -1.073              |
| <i>L. plantarum</i> LP140 | Biogenic Amines    | PEA           | 1.09                      | 0.463                  | -0.627  | -1.235              |
| <i>B. breve</i> BB010     | Biogenic Amines    | Putrescine    | 2.09                      | 2.35                   | 0.26    | 0.169               |
| <i>L. plantarum</i> LP140 | Biogenic Amines    | Putrescine    | 2.09                      | 3.21                   | 1.12    | 0.619               |
| <i>B. breve</i> BB010     | Biogenic Amines    | Serotonin     | 0.0005                    | 0.0005                 | 0       | 0                   |
| <i>L. plantarum</i> LP140 | Biogenic Amines    | Serotonin     | 0.0005                    | 0.0005                 | 0       | 0                   |
| <i>B. breve</i> BB010     | Biogenic Amines    | Spermidine    | 4.22                      | 6.13                   | 1.91    | 0.539               |
| <i>L. plantarum</i> LP140 | Biogenic Amines    | Spermidine    | 4.22                      | 0.796                  | -3.424  | -2.406              |

| Strain                    | Class                | Metabolite       | C <sub>control</sub> [ $\mu$ M] | C <sub>CFSM</sub> [ $\mu$ M] | $\Delta$ [ $\mu$ M] | log <sub>2</sub> FC |
|---------------------------|----------------------|------------------|---------------------------------|------------------------------|---------------------|---------------------|
| <i>B. breve</i> BB010     | Biogenic Amines      | TMCA             | 0.004                           | 0.003                        | -0.001              | -0.415              |
| <i>L. plantarum</i> LP140 | Biogenic Amines      | TMCA             | 0.004                           | 0.0015                       | -0.0025             | -1.415              |
| <i>B. breve</i> BB010     | Biogenic Amines      | beta-Ala         | 5.27                            | 4.39                         | -0.88               | -0.264              |
| <i>L. plantarum</i> LP140 | Biogenic Amines      | beta-Ala         | 5.27                            | 2.88                         | -2.39               | -0.872              |
| <i>B. breve</i> BB010     | Carboxylic Acids     | AconAcid         | 9.08                            | 768                          | 758.92              | 6.402               |
| <i>L. plantarum</i> LP140 | Carboxylic Acids     | AconAcid         | 9.08                            | 11.8                         | 2.72                | 0.378               |
| <i>B. breve</i> BB010     | Carboxylic Acids     | DiCA(12:0)       | 0.005                           | 0.005                        | 0                   | 0                   |
| <i>L. plantarum</i> LP140 | Carboxylic Acids     | DiCA(12:0)       | 0.005                           | 0.005                        | 0                   | 0                   |
| <i>B. breve</i> BB010     | Carboxylic Acids     | DiCA(14:0)       | 0.001                           | 0.001                        | 0                   | 0                   |
| <i>L. plantarum</i> LP140 | Carboxylic Acids     | DiCA(14:0)       | 0.001                           | 0.001                        | 0                   | 0                   |
| <i>B. breve</i> BB010     | Carboxylic Acids     | HipAcid          | 0.005                           | 0.005                        | 0                   | 0                   |
| <i>L. plantarum</i> LP140 | Carboxylic Acids     | HipAcid          | 0.005                           | 0.005                        | 0                   | 0                   |
| <i>B. breve</i> BB010     | Carboxylic Acids     | Lac              | 3234                            | 14470                        | 11236               | 2.162               |
| <i>L. plantarum</i> LP140 | Carboxylic Acids     | Lac              | 3234                            | 145059                       | 141825              | 5.487               |
| <i>B. breve</i> BB010     | Carboxylic Acids     | OH-GlutAcid      | 85.4                            | 22.8                         | -62.6               | -1.905              |
| <i>L. plantarum</i> LP140 | Carboxylic Acids     | OH-GlutAcid      | 85.4                            | 55.6                         | -29.8               | -0.619              |
| <i>B. breve</i> BB010     | Carboxylic Acids     | Spermine         | 0.62                            | 0.633                        | 0.013               | 0.03                |
| <i>L. plantarum</i> LP140 | Carboxylic Acids     | Spermine         | 0.62                            | 1.12                         | 0.5                 | 0.853               |
| <i>B. breve</i> BB010     | Cresols              | Suc              | 501                             | 597                          | 96                  | 0.253               |
| <i>L. plantarum</i> LP140 | Cresols              | Suc              | 501                             | 2094                         | 1593                | 2.063               |
| <i>B. breve</i> BB010     | Fatty Acids          | FA 12:0          | 28                              | 20.8                         | -7.2                | -0.429              |
| <i>L. plantarum</i> LP140 | Fatty Acids          | FA 12:0          | 28                              | 59.6                         | 31.6                | 1.09                |
| <i>B. breve</i> BB010     | Fatty Acids          | FA 14:0          | 214                             | 167                          | -47                 | -0.358              |
| <i>L. plantarum</i> LP140 | Fatty Acids          | FA 14:0          | 214                             | 1062                         | 848                 | 2.311               |
| <i>B. breve</i> BB010     | Fatty Acids          | FA 16:0          | 175                             | 175                          | 0                   | 0                   |
| <i>L. plantarum</i> LP140 | Fatty Acids          | FA 16:0          | 175                             | 175                          | 0                   | 0                   |
| <i>B. breve</i> BB010     | Fatty Acids          | FA 18:0          | 175                             | 175                          | 0                   | 0                   |
| <i>L. plantarum</i> LP140 | Fatty Acids          | FA 18:0          | 175                             | 175                          | 0                   | 0                   |
| <i>B. breve</i> BB010     | Fatty Acids          | FA 18:1          | 0.05                            | 0.05                         | 0                   | 0                   |
| <i>L. plantarum</i> LP140 | Fatty Acids          | FA 18:1          | 0.05                            | 0.05                         | 0                   | 0                   |
| <i>B. breve</i> BB010     | Fatty Acids          | FA 18:2          | 0.015                           | 0.015                        | 0                   | 0                   |
| <i>L. plantarum</i> LP140 | Fatty Acids          | FA 18:2          | 0.015                           | 0.015                        | 0                   | 0                   |
| <i>B. breve</i> BB010     | Fatty Acids          | FA 20:1          | 0.015                           | 0.015                        | 0                   | 0                   |
| <i>L. plantarum</i> LP140 | Fatty Acids          | FA 20:1          | 0.015                           | 0.015                        | 0                   | 0                   |
| <i>B. breve</i> BB010     | Fatty Acids          | FA 20:2          | 0.05                            | 0.05                         | 0                   | 0                   |
| <i>L. plantarum</i> LP140 | Fatty Acids          | FA 20:2          | 0.05                            | 0.05                         | 0                   | 0                   |
| <i>B. breve</i> BB010     | Fatty Acids          | FA 20:3          | 0.05                            | 0.05                         | 0                   | 0                   |
| <i>L. plantarum</i> LP140 | Fatty Acids          | FA 20:3          | 0.05                            | 2.01                         | 1.96                | 5.329               |
| <i>B. breve</i> BB010     | Fatty Acids          | FA 20:4n-6 (AA)  | 0.02                            | 0.02                         | 0                   | 0                   |
| <i>L. plantarum</i> LP140 | Fatty Acids          | FA 20:4n-6 (AA)  | 0.02                            | 0.02                         | 0                   | 0                   |
| <i>B. breve</i> BB010     | Fatty Acids          | FA 20:5n-3 (EPA) | 0.005                           | 0.005                        | 0                   | 0                   |
| <i>L. plantarum</i> LP140 | Fatty Acids          | FA 20:5n-3 (EPA) | 0.005                           | 0.005                        | 0                   | 0                   |
| <i>B. breve</i> BB010     | Fatty Acids          | p-Cresol-SO4     | 0.494                           | 0.398                        | -0.096              | -0.312              |
| <i>L. plantarum</i> LP140 | Fatty Acids          | p-Cresol-SO4     | 0.494                           | 0.305                        | -0.189              | -0.696              |
| <i>B. breve</i> BB010     | Hormones             | AbsAcid          | 0.001                           | 0.001                        | 0                   | 0                   |
| <i>L. plantarum</i> LP140 | Hormones             | AbsAcid          | 0.001                           | 0.0005                       | -0.0005             | -1.00               |
| <i>B. breve</i> BB010     | Hormones             | Cortisol         | 0.0025                          | 0.0025                       | 0                   | 0                   |
| <i>L. plantarum</i> LP140 | Hormones             | Cortisol         | 0.0025                          | 0.0025                       | 0                   | 0                   |
| <i>B. breve</i> BB010     | Hormones             | Cortisone        | 0.0025                          | 0.0025                       | 0                   | 0                   |
| <i>L. plantarum</i> LP140 | Hormones             | Cortisone        | 0.0025                          | 0.0025                       | 0                   | 0                   |
| <i>B. breve</i> BB010     | Hormones             | FA 22:6n-3 (DHA) | 0.0075                          | 0.0075                       | 0                   | 0                   |
| <i>L. plantarum</i> LP140 | Hormones             | FA 22:6n-3 (DHA) | 0.0075                          | 0.0075                       | 0                   | 0                   |
| <i>B. breve</i> BB010     | Indoles Derivatives  | 3-IAA            | 0.005                           | 0.005                        | 0                   | 0                   |
| <i>L. plantarum</i> LP140 | Indoles Derivatives  | 3-IAA            | 0.005                           | 0.005                        | 0                   | 0                   |
| <i>B. breve</i> BB010     | Indoles Derivatives  | 3-IPA            | 0.0015                          | 0.0015                       | 0                   | 0                   |
| <i>L. plantarum</i> LP140 | Indoles Derivatives  | 3-IPA            | 0.0015                          | 0.0015                       | 0                   | 0                   |
| <i>B. breve</i> BB010     | Indoles Derivatives  | DHEAS            | 0.0075                          | 0.0075                       | 0                   | 0                   |
| <i>L. plantarum</i> LP140 | Indoles Derivatives  | DHEAS            | 0.0075                          | 0.0075                       | 0                   | 0                   |
| <i>B. breve</i> BB010     | Indoles Derivatives  | Ind-SO4          | 0.014                           | 0.017                        | 0.003               | 0.28                |
| <i>L. plantarum</i> LP140 | Indoles Derivatives  | Ind-SO4          | 0.014                           | 0.011                        | -0.003              | -0.348              |
| <i>B. breve</i> BB010     | Nucleobases Related  | Hypoxanthine     | 7.9                             | 15                           | 7.1                 | 0.925               |
| <i>L. plantarum</i> LP140 | Nucleobases Related  | Hypoxanthine     | 7.9                             | 0.05                         | -7.85               | -7.304              |
| <i>B. breve</i> BB010     | Nucleobases Related  | Indole           | 2                               | 2                            | 0                   | 0                   |
| <i>L. plantarum</i> LP140 | Nucleobases Related  | Indole           | 2                               | 2                            | 0                   | 0                   |
| <i>B. breve</i> BB010     | Other                | Choline          | 39.6                            | 47.1                         | 7.5                 | 0.25                |
| <i>L. plantarum</i> LP140 | Other                | Choline          | 39.6                            | 14.8                         | -24.8               | -1.42               |
| <i>B. breve</i> BB010     | Vitamins & Cofactors | Xanthine         | 13.8                            | 4.45                         | -9.35               | -1.633              |
| <i>L. plantarum</i> LP140 | Vitamins & Cofactors | Xanthine         | 13.8                            | 0.2                          | -13.6               | -6.109              |

**Figure S1. Baseline-corrected metabolite signatures in bacterial CFSM (targeted LC-MS/MS).** Net changes are shown as  $\Delta = C_{\text{CFSM}} - C_{\text{control}}$  after run-matched medium-only baseline correction within each analytical run (“test”). Points are individual tests; diamonds and bars denote mean  $\pm$  95% CI ( $n \geq 3$ ). q-values were obtained by BH-FDR correction across analytes within each strain (\* $q < 0.05$ , \*\* $q < 0.01$ , \*\*\* $q < 0.001$ ). Panel groups: **(A)** Fermentation-derived carboxylic acids (SCFAs, lactate and related organic acids); **(B)** B vitamins and vitamers; **(C)** amino acids (incl. GABA); **(D)** polyamines and related biogenic amines.

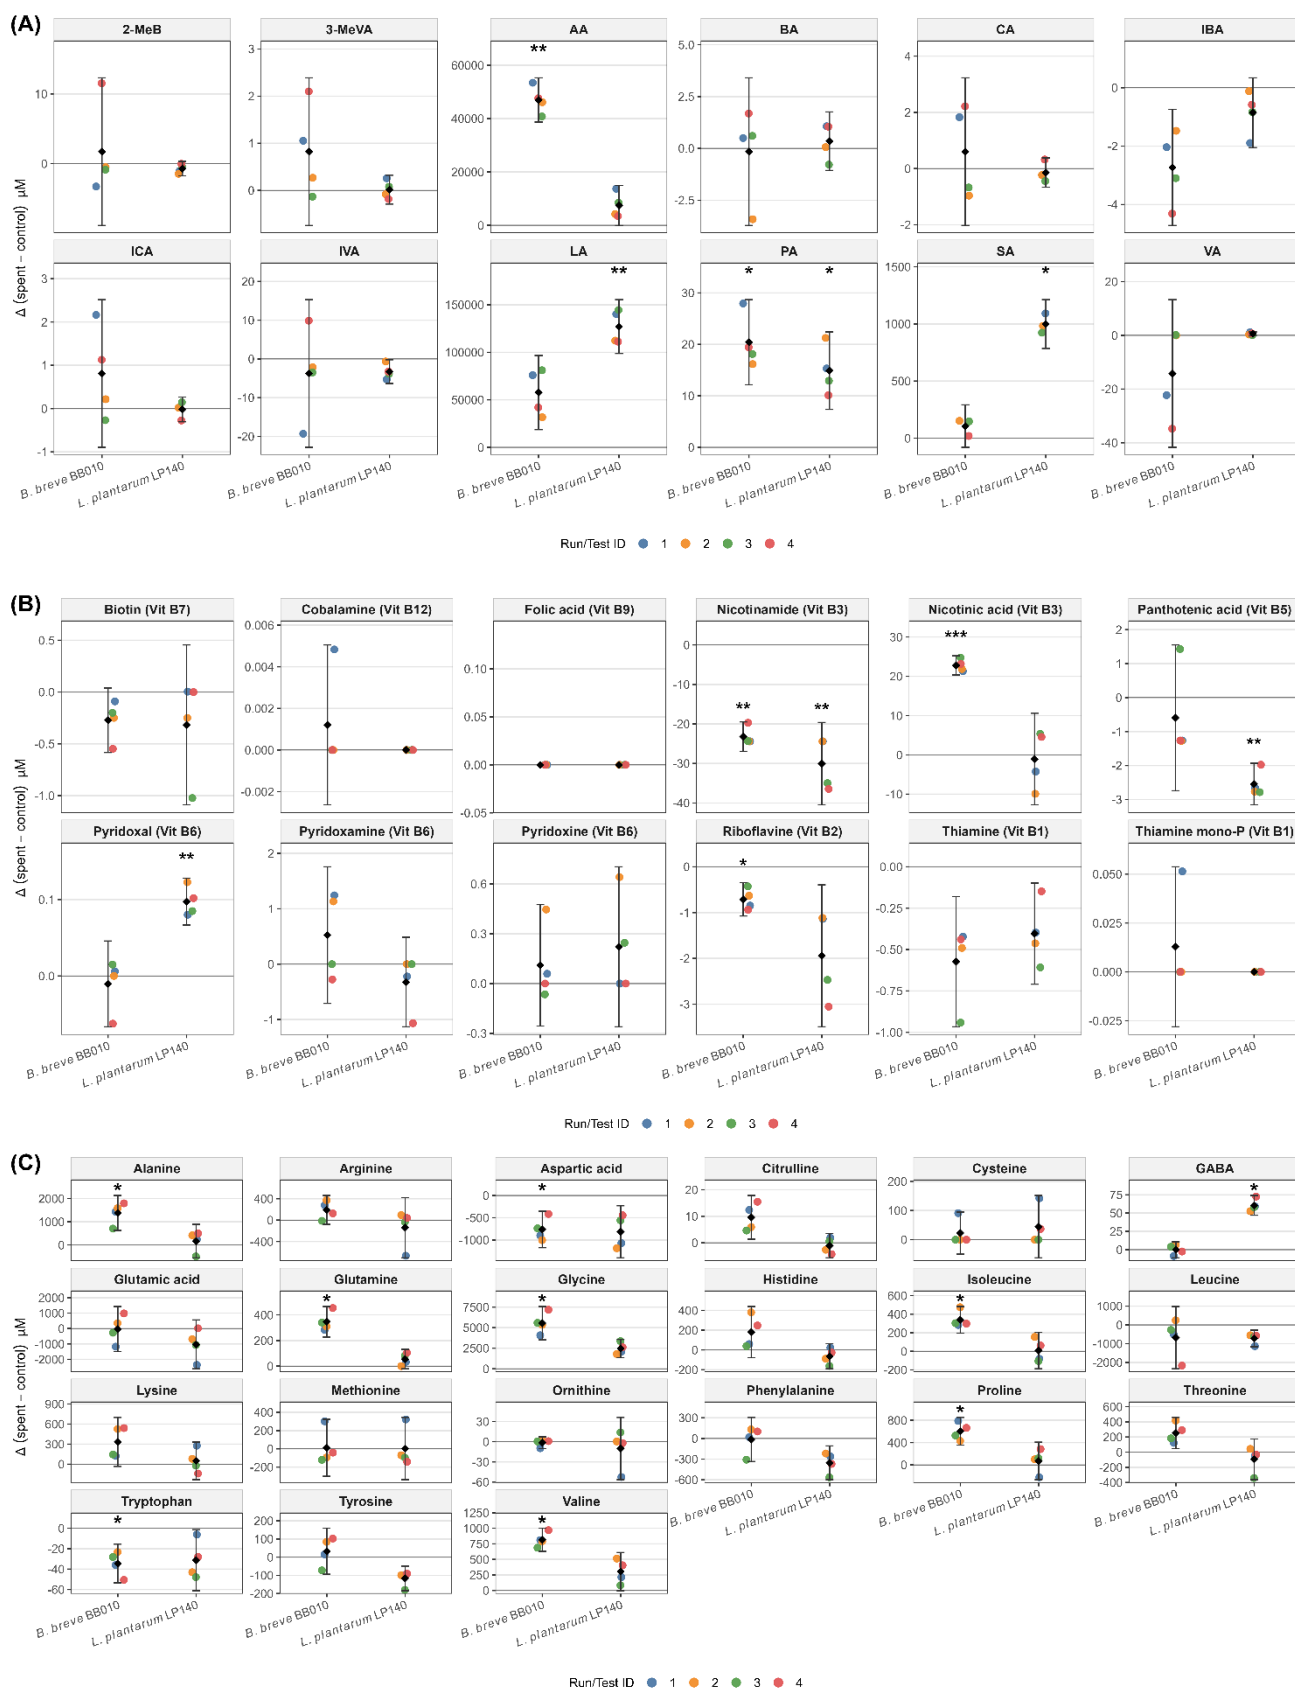

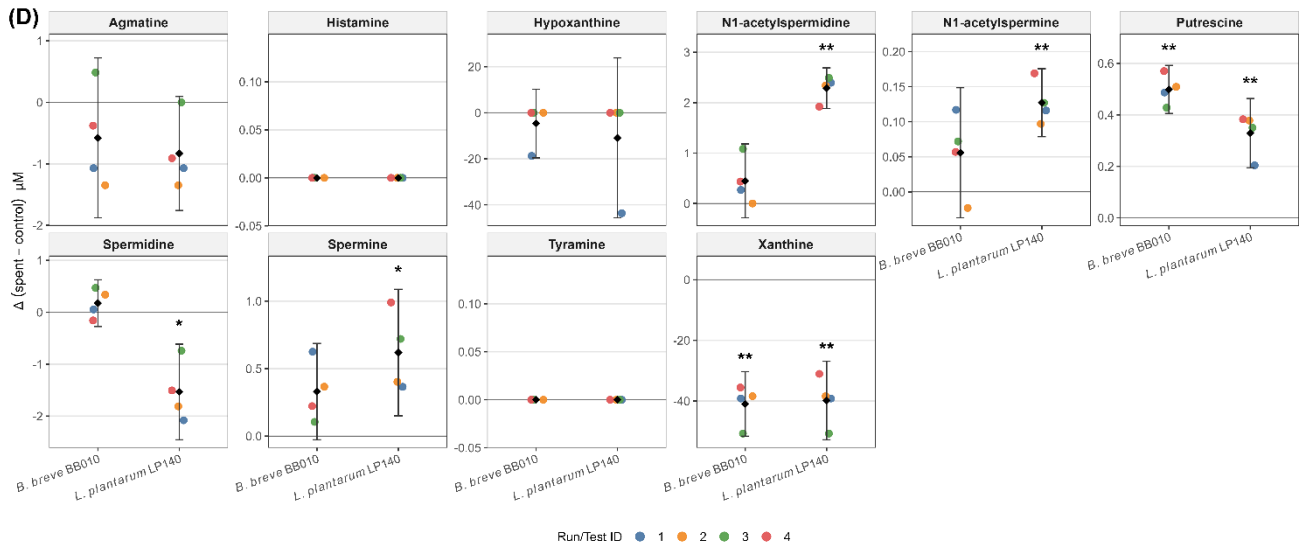

Supplement: Supplementary file 1 [file b3a0d402bb5ed57b29c0e159.pdf]
